# Supplementary material
Source: PubMed Central journal article supplement (PMC7963637)
Supplement: 17-00383.pdf [file 17-00383.pdf]

## ON-LINE APPENDIX

### Top 10 High Engagement Rate @TheAJNR Tweets during Study Period

1. A 39-year-old woman with sudden severe headache, vertigo, and nausea <https://t.co/ZMxczbZUId4> #NeuroRad <https://t.co/BrFzlrRuly>

2. #AJNRReview- Gadolinium-Based Contrast Agent Accumulation and Toxicity: An Update <https://t.co/kDMNdfYXP5>

3. 27-yo woman with influenza A infection + headache, fever, & convulsions <http://t.co/5p8MhdXrE7> #NeuroRad <http://t.co/fo1hXq5Oeo>

4. 25yo woman w/ left limb wkness since childhood & new dysarthria + walking imbalance <http://t.co/0HjHfkI8qQ> #NeuroRad <http://t.co/xyjZyE36Er>

5. A 24-year-old woman with acute-onset painful right 3rd

nerve palsy <https://t.co/gfiAi4nsth> #NeuroRad <https://t.co/bojkwrb31a>

6. A 33-year-old man with severe conduct disorder and weakening of both legs <http://t.co/IuqmFIpgUL> #NeuroRad <http://t.co/z6VdWDCP55>

7. A 59-year-old woman with incidental findings on CT <https://t.co/2Zlq34xhvV> #NeuroRad <https://t.co/IU0u6NQUIj>

8. An 86-year-old-woman with nonsyncopal fall without loss of consciousness <https://t.co/y7NrUIRrxjZ> #NeuroRad <https://t.co/bLAidnO6DX>

9. 37yo W, hx chronic headache, livedo racemosa, w/ svr headache, photo/phonophobia <https://t.co/V6cpMMLx1Z> #NeuroRad <https://t.co/X7Pf2e66jM>

10. A 36-year-old man with chronic back pain <https://t.co/nZfKrhtC3y> #NeuroRad <https://t.co/YWEo2nY7jF>
